# Supplementary material for: Yellow Pigments, Fomitellanols A and B, and Drimane Sesquiterpenoids, Cryptoporic Acids P and Q, from Fomitella fraxinea and Their Inhibitory Activity against COX and 5-LO
Source: MDPI journal article supplement (doi:10.3390/molecules18044181), 2013-04-09
Supplement: s1 [file s1]

data_ff

 

_audit_creation_method            SHELXL-97
_publ_contact_author_name 'Kazuko Yoshikawa'
_publ_contact_author_address
;
Faculty of pharmaceutical sciences, Tokushima Bunri University
180 Nishihamabouji, Yamashiro-cyo, Tokushima, Tokushima, Japan
;
_publ_contact_author_email 'yosikawa@ph.bunri-u.ac.jp'
_publ_author_name
;
Kazuko Yoshikawa,
Kazuaki Kouso, 
Masumi Shimomura, 
Masami Tanaka,
Hirofumi Yamamoto,
Hiroshi Imagawa, 
Shigenobu Arihara,
Toshihiro Hashimoto
;
_journal_name_full
;
molecules
;

_chemical_name_systematic

;
((1S,9aS,9bR)-1-isopropoxy-5-methoxy-9b-methyl-9-oxo-
1,9,9a,9b-tetrahydrocyclopenta[6,7]naphtho[1,8-bc]furan-7-yl)methyl 4-bromobenzoate
;


_chemical_name_common             ?

_chemical_melting_point           173

_chemical_formula_moiety          ?

_chemical_formula_sum

 'C29 H31 Br O7'

_chemical_formula_weight          571.45

 

loop_

 _atom_type_symbol

 _atom_type_description

 _atom_type_scat_dispersion_real

 _atom_type_scat_dispersion_imag

 _atom_type_scat_source

 'C'  'C'   0.0033   0.0016

 'International Tables Vol C Tables 4.2.6.8 and 6.1.1.4'

 'H'  'H'   0.0000   0.0000

 'International Tables Vol C Tables 4.2.6.8 and 6.1.1.4'

 'O'  'O'   0.0106   0.0060

 'International Tables Vol C Tables 4.2.6.8 and 6.1.1.4'

 'Br'  'Br'  -0.2901   2.4595

 'International Tables Vol C Tables 4.2.6.8 and 6.1.1.4'

 

_symmetry_cell_setting            Monoclinic

_symmetry_space_group_name_H-M    C2

 

loop_

 _symmetry_equiv_pos_as_xyz

 'x, y, z'

 '-x, y, -z'

 'x+1/2, y+1/2, z'

 '-x+1/2, y+1/2, -z'

 

_cell_length_a                    28.078(6)

_cell_length_b                    6.7924(15)

_cell_length_c                    14.053(3)

_cell_angle_alpha                 90.00

_cell_angle_beta                  100.059(3)

_cell_angle_gamma                 90.00

_cell_volume                      2639.0(10)

_cell_formula_units_Z             4

_cell_measurement_temperature     296


_cell_measurement_reflns_used     6700

_cell_measurement_theta_min       2.26

_cell_measurement_theta_max       28.61

 

_exptl_crystal_description        cube

_exptl_crystal_colour             colorless

_exptl_crystal_size_max           0.30

_exptl_crystal_size_mid           0.20

_exptl_crystal_size_min           0.20

_exptl_crystal_density_meas       'not measured'

_exptl_crystal_density_diffrn     1.438

_exptl_crystal_density_method     'not measured'

_exptl_crystal_F_000              1184

_exptl_absorpt_coefficient_mu     1.604

_exptl_absorpt_correction_type    empirical

_exptl_absorpt_correction_T_min   0.6448

_exptl_absorpt_correction_T_max   0.7398

_exptl_absorpt_process_details 
   
;
SADABS Sheldrick 1996
;

 
_exptl_special_details

;

 

;

 

_diffrn_ambient_temperature       296(2)

_diffrn_radiation_wavelength      0.71073

_diffrn_radiation_type            MoK\a

_diffrn_radiation_source          'rotating anode' 

_diffrn_radiation_monochromator   'multilayered conforcal mirror'
 
_diffrn_measurement_device_type   'CCD area detector'

_diffrn_measurement_method        'phi and omega scans'

_diffrn_detector_area_resol_mean  8.333

_diffrn_standards_number          ?

_diffrn_standards_interval_count  ?

_diffrn_standards_interval_time   ?

_diffrn_standards_decay_%         ?

_diffrn_reflns_number             7490

_diffrn_reflns_av_R_equivalents   0.0207

_diffrn_reflns_av_sigmaI/netI     0.0565

_diffrn_reflns_limit_h_min        -37

_diffrn_reflns_limit_h_max        32

_diffrn_reflns_limit_k_min        -9

_diffrn_reflns_limit_k_max        8

_diffrn_reflns_limit_l_min        -18

_diffrn_reflns_limit_l_max        17

_diffrn_reflns_theta_min          1.47

_diffrn_reflns_theta_max          28.78

_reflns_number_total              4956

_reflns_number_gt                 4813

_reflns_threshold_expression      >2sigma(I)

 

_computing_data_collection        'Bruker  APEX2'

_computing_cell_refinement        'Bruker  APEX2'

_computing_data_reduction         'Bruker  APEX2'

_computing_structure_solution     'SHELXS-97 (Sheldrick, 1990)'

_computing_structure_refinement   'SHELXL-97 (Sheldrick, 1997)'

_computing_molecular_graphics     'Bruker SHELXTL'

_computing_publication_material   'Bruker SHELXTL'

 

_refine_special_details

;

 Refinement of F^2^ against ALL reflections.  The weighted R-factor wR and

 goodness of fit S are based on F^2^, conventional R-factors R are based

 on F, with F set to zero for negative F^2^. The threshold expression of

 F^2^ > 2sigma(F^2^) is used only for calculating R-factors(gt) etc. and is

 not relevant to the choice of reflections for refinement.  R-factors based

 on F^2^ are statistically about twice as large as those based on F, and R-

 factors based on ALL data will be even larger.

;

 

_refine_ls_structure_factor_coef  Fsqd

_refine_ls_matrix_type            full

_refine_ls_weighting_scheme       calc

_refine_ls_weighting_details

 'calc w=1/[\s^2^(Fo^2^)+(0.0000P)^2^+0.0000P] where P=(Fo^2^+2Fc^2^)/3'

_atom_sites_solution_primary      direct

_atom_sites_solution_secondary    difmap

_atom_sites_solution_hydrogens    geom

_refine_ls_hydrogen_treatment     mixed

_refine_ls_extinction_method      none

_refine_ls_extinction_coef        ?

_refine_ls_abs_structure_details

 'Flack H D (1983), Acta Cryst. A39, 876-881'

_refine_ls_abs_structure_Flack    -0.001(6)

_refine_ls_number_reflns          4956

_refine_ls_number_parameters      321

_refine_ls_number_restraints      1

_refine_ls_R_factor_all           0.0342

_refine_ls_R_factor_gt            0.0332

_refine_ls_wR_factor_ref          0.0863

_refine_ls_wR_factor_gt           0.0859

_refine_ls_goodness_of_fit_ref    1.566

_refine_ls_restrained_S_all       1.565

_refine_ls_shift/su_max           0.001

_refine_ls_shift/su_mean          0.000

 

loop_

 _atom_site_label

 _atom_site_type_symbol

 _atom_site_fract_x

 _atom_site_fract_y

 _atom_site_fract_z

 _atom_site_U_iso_or_equiv

 _atom_site_adp_type

 _atom_site_occupancy

 _atom_site_symmetry_multiplicity

 _atom_site_calc_flag

 _atom_site_refinement_flags

 _atom_site_disorder_assembly

 _atom_site_disorder_group

Br1 Br 0.050859(9) -0.87045(5) 0.421416(15) 0.02756(9) Uani 1 1 d . . .

C1 C 0.23265(9) 0.8574(4) 0.10769(16) 0.0167(5) Uani 1 1 d . . .

C2 C 0.26972(9) 0.9914(4) 0.09924(16) 0.0193(5) Uani 1 1 d . . .

H2 H 0.2643 1.0883 0.0519 0.023 Uiso 1 1 calc R . .

C5 C 0.28390(9) 0.7169(4) 0.24299(16) 0.0156(5) Uani 1 1 d . . .

C3 C 0.31506(10) 0.9825(4) 0.16090(18) 0.0202(5) Uani 1 1 d . . .

H3 H 0.3399 1.0686 0.1536 0.024 Uiso 1 1 calc R . .

C6 C 0.24019(9) 0.7115(4) 0.18060(16) 0.0157(5) Uani 1 1 d . . .

C4 C 0.32116(9) 0.8406(4) 0.23283(17) 0.0180(5) Uani 1 1 d . . .

C15 C 0.15224(9) 0.1579(4) 0.22255(17) 0.0201(5) Uani 1 1 d . . .

H15A H 0.1298 0.2623 0.2309 0.024 Uiso 1 1 calc R . .

H15B H 0.1510 0.1366 0.1539 0.024 Uiso 1 1 calc R . .

C11 C 0.28412(9) 0.6449(5) 0.41905(15) 0.0214(5) Uani 1 1 d . . .

H11A H 0.2959 0.7757 0.4347 0.032 Uiso 1 1 calc R . .

H11B H 0.2969 0.5570 0.4707 0.032 Uiso 1 1 calc R . .

H11C H 0.2494 0.6447 0.4103 0.032 Uiso 1 1 calc R . .

C13 C 0.23129(8) 0.1110(4) 0.33921(14) 0.0164(4) Uani 1 1 d . . .

H13 H 0.2229 -0.0063 0.3662 0.020 Uiso 1 1 calc R . .

C16 C 0.09867(10) -0.1073(4) 0.22346(19) 0.0225(5) Uani 1 1 d . . .

C7 C 0.20768(9) 0.5465(4) 0.19034(16) 0.0155(5) Uani 1 1 d . . .

H7 H 0.1753 0.5495 0.1611 0.019 Uiso 1 1 calc R . .

C9 C 0.27921(8) 0.3763(4) 0.29211(15) 0.0140(4) Uani 1 1 d . . .

H9 H 0.2975 0.3269 0.2438 0.017 Uiso 1 1 calc R . .

C22 C 0.05078(9) -0.4107(4) 0.22848(17) 0.0229(6) Uani 1 1 d . . .

H22 H 0.0333 -0.3749 0.1685 0.027 Uiso 1 1 calc R . .

C18 C 0.11462(9) -0.3453(4) 0.36434(17) 0.0223(6) Uani 1 1 d . . .

H18 H 0.1400 -0.2667 0.3942 0.027 Uiso 1 1 calc R . .

C8 C 0.22634(9) 0.3907(4) 0.24313(15) 0.0151(4) Uani 1 1 d . . .

C21 C 0.03937(9) -0.5834(4) 0.27261(17) 0.0215(5) Uani 1 1 d . . .

H21 H 0.0144 -0.6641 0.2427 0.026 Uiso 1 1 calc R . .

C14 C 0.20229(9) 0.2124(4) 0.26967(15) 0.0156(4) Uani 1 1 d . . .

C20 C 0.06586(9) -0.6329(4) 0.36204(17) 0.0187(5) Uani 1 1 d . . .

C17 C 0.08846(9) -0.2905(4) 0.27396(18) 0.0199(5) Uani 1 1 d . . .

C23 C 0.18079(12) 0.9859(5) -0.03163(19) 0.0289(6) Uani 1 1 d . . .

H23A H 0.1840 1.1189 -0.0083 0.043 Uiso 1 1 calc R . .

H23B H 0.1489 0.9666 -0.0682 0.043 Uiso 1 1 calc R . .

H23C H 0.2043 0.9613 -0.0722 0.043 Uiso 1 1 calc R . .

C12 C 0.27838(9) 0.2123(4) 0.36663(16) 0.0166(5) Uani 1 1 d . . .

C24 C 0.42677(9) 0.4439(4) 0.30372(18) 0.0218(5) Uani 1 1 d . . .

H24 H 0.4403 0.5611 0.3392 0.026 Uiso 1 1 calc R . .

C19 C 0.10296(10) -0.5150(4) 0.40933(18) 0.0224(5) Uani 1 1 d . . .

H19 H 0.1196 -0.5496 0.4701 0.027 Uiso 1 1 calc R . .

C10 C 0.30022(9) 0.5768(3) 0.32537(16) 0.0157(5) Uani 1 1 d . . .

O3 O 0.37456(7) 0.4643(3) 0.27953(13) 0.0193(4) Uani 1 1 d . . .

O1 O 0.18847(7) 0.8530(3) 0.04852(12) 0.0211(4) Uani 1 1 d . . .

O5 O 0.13974(7) -0.0198(3) 0.26782(12) 0.0216(4) Uani 1 1 d . . .

O4 O 0.31063(7) 0.1743(3) 0.43397(12) 0.0219(4) Uani 1 1 d . . .

O2 O 0.36258(7) 0.8011(3) 0.29877(13) 0.0216(4) Uani 1 1 d . . .

O6 O 0.07351(8) -0.0425(4) 0.15199(16) 0.0400(6) Uani 1 1 d . . .

C25 C 0.43862(12) 0.2648(5) 0.3672(2) 0.0342(7) Uani 1 1 d . . .

H25A H 0.4243 0.2784 0.4241 0.051 Uiso 1 1 calc R . .

H25B H 0.4731 0.2531 0.3855 0.051 Uiso 1 1 calc R . .

H25C H 0.4260 0.1492 0.3323 0.051 Uiso 1 1 calc R . .

C26 C 0.44594(11) 0.4303(6) 0.2094(2) 0.0387(8) Uani 1 1 d . . .

H26A H 0.4341 0.3122 0.1759 0.058 Uiso 1 1 calc R . .

H26B H 0.4806 0.4275 0.2227 0.058 Uiso 1 1 calc R . .

H26C H 0.4352 0.5426 0.1699 0.058 Uiso 1 1 calc R . .

C27 C 0.35584(9) 0.6030(4) 0.33568(16) 0.0187(5) Uani 1 1 d . . .

H27 H 0.3714 0.5919 0.4035 0.022 Uiso 1 1 calc R . .

O7 O 0.0000 0.4527(6) 1.0000 0.0436(8) Uiso 1 2 d S . .

C28 C 0.04073(17) 0.3368(8) 0.9944(3) 0.0617(11) Uiso 1 1 d . . .

C29 C 0.0817(2) 0.4697(10) 0.9849(4) 0.0901(16) Uiso 1 1 d . . .

 

loop_

 _atom_site_aniso_label

 _atom_site_aniso_U_11

 _atom_site_aniso_U_22

 _atom_site_aniso_U_33

 _atom_site_aniso_U_23

 _atom_site_aniso_U_13

 _atom_site_aniso_U_12

Br1 0.02548(14) 0.02864(15) 0.02677(13) 0.00773(11) -0.00043(9) -0.01069(13)

C1 0.0187(12) 0.0155(12) 0.0163(11) -0.0010(8) 0.0045(9) -0.0010(9)

C2 0.0253(14) 0.0157(12) 0.0182(11) 0.0000(8) 0.0071(10) -0.0017(10)

C5 0.0195(12) 0.0136(11) 0.0147(10) -0.0017(8) 0.0059(9) 0.0020(9)

C3 0.0218(13) 0.0141(12) 0.0266(12) -0.0002(9) 0.0094(10) -0.0016(10)

C6 0.0168(12) 0.0163(11) 0.0149(10) -0.0005(8) 0.0050(9) 0.0024(9)

C4 0.0191(13) 0.0158(12) 0.0194(11) -0.0023(8) 0.0040(9) -0.0008(10)

C15 0.0163(11) 0.0213(16) 0.0226(11) 0.0045(9) 0.0030(9) -0.0012(10)

C11 0.0256(12) 0.0211(13) 0.0174(10) -0.0017(10) 0.0034(9) 0.0054(13)

C13 0.0168(10) 0.0151(11) 0.0179(9) 0.0036(9) 0.0049(8) 0.0011(11)

C16 0.0179(13) 0.0213(14) 0.0269(12) 0.0034(10) 0.0002(10) -0.0019(10)

C7 0.0140(12) 0.0183(11) 0.0142(10) 0.0011(8) 0.0026(9) 0.0009(9)

C9 0.0131(11) 0.0139(11) 0.0152(10) -0.0001(8) 0.0035(8) 0.0009(9)

C22 0.0157(11) 0.0297(18) 0.0221(11) 0.0021(9) 0.0001(9) -0.0011(10)

C18 0.0185(12) 0.0230(16) 0.0235(11) 0.0005(10) -0.0016(9) -0.0060(11)

C8 0.0135(11) 0.0160(11) 0.0160(10) -0.0006(8) 0.0034(9) -0.0008(9)

C21 0.0134(12) 0.0249(14) 0.0249(12) -0.0018(9) 0.0003(10) -0.0052(10)

C14 0.0157(12) 0.0168(11) 0.0153(10) 0.0001(8) 0.0054(9) 0.0005(9)

C20 0.0174(12) 0.0191(13) 0.0205(11) 0.0020(9) 0.0059(9) -0.0020(10)

C17 0.0133(12) 0.0218(12) 0.0237(12) 0.0039(9) 0.0002(10) 0.0020(10)

C23 0.0357(17) 0.0277(15) 0.0220(13) 0.0112(10) 0.0012(11) 0.0009(13)

C12 0.0186(12) 0.0155(11) 0.0157(10) -0.0001(8) 0.0031(9) 0.0021(10)

C24 0.0124(12) 0.0226(14) 0.0294(13) -0.0021(9) 0.0011(10) 0.0014(10)

C19 0.0215(13) 0.0246(14) 0.0200(12) 0.0034(9) 0.0003(10) -0.0043(11)

C10 0.0139(11) 0.0162(13) 0.0161(10) -0.0002(7) 0.0007(8) 0.0012(8)

O3 0.0116(9) 0.0205(10) 0.0255(9) -0.0068(7) 0.0022(7) 0.0005(7)

O1 0.0241(10) 0.0203(10) 0.0174(8) 0.0068(6) -0.0003(7) 0.0031(8)

O5 0.0169(9) 0.0244(10) 0.0226(9) 0.0068(7) 0.0008(7) -0.0051(8)

O4 0.0205(9) 0.0200(11) 0.0229(8) 0.0047(6) -0.0026(7) 0.0029(7)

O2 0.0169(10) 0.0177(9) 0.0293(9) -0.0028(7) 0.0013(7) -0.0039(8)

O6 0.0290(12) 0.0384(14) 0.0446(12) 0.0203(10) -0.0156(9) -0.0127(11)

C25 0.0253(16) 0.0264(16) 0.0466(17) 0.0047(12) -0.0054(12) 0.0033(13)

C26 0.0176(14) 0.062(2) 0.0377(16) -0.0043(14) 0.0074(12) 0.0031(15)

C27 0.0158(11) 0.0186(14) 0.0209(10) -0.0037(9) 0.0008(8) -0.0015(11)

 

_geom_special_details

;

 All esds (except the esd in the dihedral angle between two l.s. planes)

 are estimated using the full covariance matrix.  The cell esds are taken

 into account individually in the estimation of esds in distances, angles

 and torsion angles; correlations between esds in cell parameters are only

 used when they are defined by crystal symmetry.  An approximate (isotropic)

 treatment of cell esds is used for estimating esds involving l.s. planes.

;

 

loop_

 _geom_bond_atom_site_label_1

 _geom_bond_atom_site_label_2

 _geom_bond_distance

 _geom_bond_site_symmetry_2

 _geom_bond_publ_flag

Br1 C20 1.898(3) . ?

C1 O1 1.368(3) . ?

C1 C6 1.415(3) . ?

C1 C2 1.403(3) . ?

C2 C3 1.411(4) . ?

C2 H2 0.9300 . ?

C5 C4 1.369(3) . ?

C5 C6 1.379(3) . ?

C5 C10 1.507(3) . ?

C3 C4 1.386(3) . ?

C3 H3 0.9300 . ?

C6 C7 1.467(3) . ?

C4 O2 1.381(3) . ?

C15 O5 1.436(3) . ?

C15 C14 1.492(3) . ?

C15 H15A 0.9700 . ?

C15 H15B 0.9700 . ?

C11 C10 1.536(3) . ?

C11 H11A 0.9600 . ?

C11 H11B 0.9600 . ?

C11 H11C 0.9600 . ?

C13 C14 1.347(3) . ?

C13 C12 1.481(4) . ?

C13 H13 0.9300 . ?

C16 O6 1.206(3) . ?

C16 O5 1.349(3) . ?

C16 C17 1.485(4) . ?

C7 C8 1.345(3) . ?

C7 H7 0.9300 . ?

C9 C10 1.524(3) . ?

C9 C12 1.532(3) . ?

C9 C8 1.526(3) . ?

C9 H9 0.9800 . ?

C22 C21 1.390(4) . ?

C22 C17 1.399(4) . ?

C22 H22 0.9300 . ?

C18 C19 1.382(4) . ?

C18 C17 1.402(3) . ?

C18 H18 0.9300 . ?

C8 C14 1.467(3) . ?

C21 C20 1.385(4) . ?

C21 H21 0.9300 . ?

C20 C19 1.388(4) . ?

C23 O1 1.430(3) . ?

C23 H23A 0.9600 . ?

C23 H23B 0.9600 . ?

C23 H23C 0.9600 . ?

C12 O4 1.218(3) . ?

C24 O3 1.452(3) . ?

C24 C25 1.510(4) . ?

C24 C26 1.518(3) . ?

C24 H24 0.9800 . ?

C19 H19 0.9300 . ?

C10 C27 1.553(3) . ?

O3 C27 1.390(3) . ?

O2 C27 1.466(3) . ?

C25 H25A 0.9600 . ?

C25 H25B 0.9600 . ?

C25 H25C 0.9600 . ?

C26 H26A 0.9600 . ?

C26 H26B 0.9600 . ?

C26 H26C 0.9600 . ?

C27 H27 0.9800 . ?

O7 C28 1.402(5) 2_557 ?

O7 C28 1.402(5) . ?

C28 C29 1.488(7) . ?

 

loop_

 _geom_angle_atom_site_label_1

 _geom_angle_atom_site_label_2

 _geom_angle_atom_site_label_3

 _geom_angle

 _geom_angle_site_symmetry_1

 _geom_angle_site_symmetry_3

 _geom_angle_publ_flag

O1 C1 C6 115.5(2) . . ?

O1 C1 C2 124.7(2) . . ?

C6 C1 C2 119.8(2) . . ?

C1 C2 C3 121.6(2) . . ?

C1 C2 H2 119.2 . . ?

C3 C2 H2 119.2 . . ?

C4 C5 C6 124.2(2) . . ?

C4 C5 C10 109.4(2) . . ?

C6 C5 C10 126.1(2) . . ?

C4 C3 C2 117.5(2) . . ?

C4 C3 H3 121.3 . . ?

C2 C3 H3 121.3 . . ?

C5 C6 C1 116.5(2) . . ?

C5 C6 C7 117.4(2) . . ?

C1 C6 C7 125.9(2) . . ?

C5 C4 C3 120.3(2) . . ?

C5 C4 O2 112.3(2) . . ?

C3 C4 O2 127.4(2) . . ?

O5 C15 C14 107.2(2) . . ?

O5 C15 H15A 110.3 . . ?

C14 C15 H15A 110.3 . . ?

O5 C15 H15B 110.3 . . ?

C14 C15 H15B 110.3 . . ?

H15A C15 H15B 108.5 . . ?

C10 C11 H11A 109.5 . . ?

C10 C11 H11B 109.5 . . ?

H11A C11 H11B 109.5 . . ?

C10 C11 H11C 109.5 . . ?

H11A C11 H11C 109.5 . . ?

H11B C11 H11C 109.5 . . ?

C14 C13 C12 110.5(2) . . ?

C14 C13 H13 124.7 . . ?

C12 C13 H13 124.7 . . ?

O6 C16 O5 123.6(3) . . ?

O6 C16 C17 124.8(3) . . ?

O5 C16 C17 111.6(2) . . ?

C8 C7 C6 117.6(2) . . ?

C8 C7 H7 121.2 . . ?

C6 C7 H7 121.2 . . ?

C10 C9 C12 119.42(19) . . ?

C10 C9 C8 112.02(19) . . ?

C12 C9 C8 103.01(19) . . ?

C10 C9 H9 107.3 . . ?

C12 C9 H9 107.3 . . ?

C8 C9 H9 107.3 . . ?

C21 C22 C17 120.2(2) . . ?

C21 C22 H22 119.9 . . ?

C17 C22 H22 119.9 . . ?

C19 C18 C17 120.5(2) . . ?

C19 C18 H18 119.8 . . ?

C17 C18 H18 119.8 . . ?

C7 C8 C14 129.6(2) . . ?

C7 C8 C9 123.6(2) . . ?

C14 C8 C9 106.7(2) . . ?

C20 C21 C22 118.7(2) . . ?

C20 C21 H21 120.6 . . ?

C22 C21 H21 120.6 . . ?

C13 C14 C8 111.1(2) . . ?

C13 C14 C15 126.8(2) . . ?

C8 C14 C15 122.1(2) . . ?

C21 C20 C19 122.3(2) . . ?

C21 C20 Br1 118.7(2) . . ?

C19 C20 Br1 119.1(2) . . ?

C18 C17 C22 119.6(2) . . ?

C18 C17 C16 122.8(2) . . ?

C22 C17 C16 117.7(2) . . ?

O1 C23 H23A 109.5 . . ?

O1 C23 H23B 109.5 . . ?

H23A C23 H23B 109.5 . . ?

O1 C23 H23C 109.5 . . ?

H23A C23 H23C 109.5 . . ?

H23B C23 H23C 109.5 . . ?

O4 C12 C13 127.8(2) . . ?

O4 C12 C9 126.0(2) . . ?

C13 C12 C9 106.2(2) . . ?

O3 C24 C25 108.9(2) . . ?

O3 C24 C26 107.4(2) . . ?

C25 C24 C26 113.0(3) . . ?

O3 C24 H24 109.1 . . ?

C25 C24 H24 109.1 . . ?

C26 C24 H24 109.1 . . ?

C18 C19 C20 118.7(2) . . ?

C18 C19 H19 120.6 . . ?

C20 C19 H19 120.6 . . ?

C5 C10 C9 106.20(19) . . ?

C5 C10 C11 111.9(2) . . ?

C9 C10 C11 112.1(2) . . ?

C5 C10 C27 99.51(18) . . ?

C9 C10 C27 117.39(19) . . ?

C11 C10 C27 109.09(19) . . ?

C27 O3 C24 113.47(19) . . ?

C1 O1 C23 117.5(2) . . ?

C16 O5 C15 114.9(2) . . ?

C4 O2 C27 105.68(19) . . ?

C24 C25 H25A 109.5 . . ?

C24 C25 H25B 109.5 . . ?

H25A C25 H25B 109.5 . . ?

C24 C25 H25C 109.5 . . ?

H25A C25 H25C 109.5 . . ?

H25B C25 H25C 109.5 . . ?

C24 C26 H26A 109.5 . . ?

C24 C26 H26B 109.5 . . ?

H26A C26 H26B 109.5 . . ?

C24 C26 H26C 109.5 . . ?

H26A C26 H26C 109.5 . . ?

H26B C26 H26C 109.5 . . ?

O3 C27 O2 109.64(17) . . ?

O3 C27 C10 110.07(19) . . ?

O2 C27 C10 105.2(2) . . ?

O3 C27 H27 110.6 . . ?

O2 C27 H27 110.6 . . ?

C10 C27 H27 110.6 . . ?

C28 O7 C28 111.7(5) 2_557 . ?

O7 C28 C29 108.4(5) . . ?

 

_diffrn_measured_fraction_theta_max    0.905

_diffrn_reflns_theta_full              28.78

_diffrn_measured_fraction_theta_full   0.905

_refine_diff_density_max    0.905

_refine_diff_density_min   -0.427

_refine_diff_density_rms    0.073
